# Supplementary material for: Increased frequency of circulating Tc22/Th22 cells and polyfunctional CD38− T cells in HIV-exposed uninfected subjects
Source: PubMed Central journal article supplement (PMC4561954; doi:10.1038/srep13883), 2015-09-08
Supplement: srep13883-s1.pdf [file srep13883-s1.pdf]

**Title:** Increased frequency of circulating Tc22/Th22 cells and polyfunctional CD38<sup>-</sup> T cells in HIV-exposed uninfected subjects

**Authors:** Luanda M. S. Oliveira<sup>1</sup>, Josenilson F. Lima<sup>1</sup>, Cesar A.C. Cervantes<sup>1</sup>, Jorge Simão Casseb<sup>1,2</sup>, Marcelo Mendonça<sup>3</sup>, Alberto J.S. Duarte<sup>1</sup>, Maria N. Sato<sup>1</sup>.

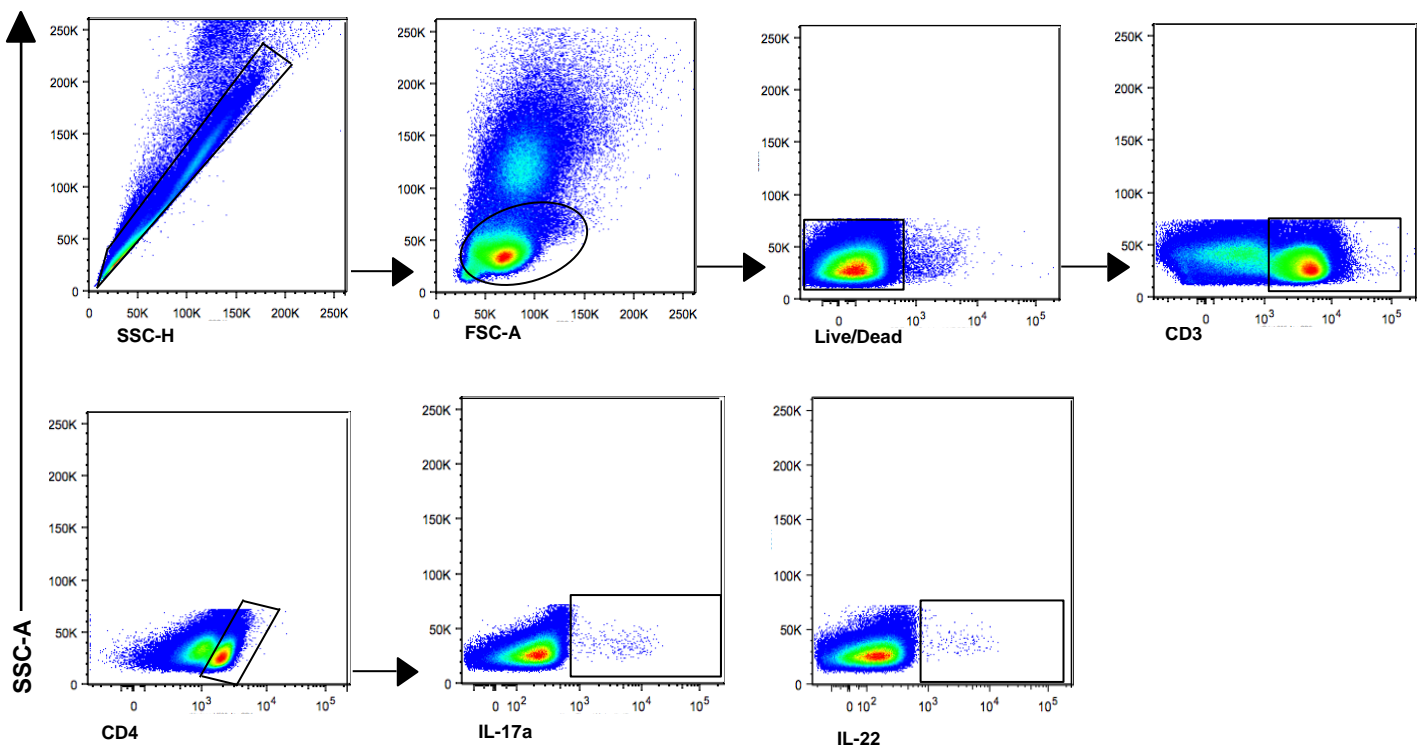

**Supplementary Figure 1.** Gating strategy to evaluate CD4<sup>+</sup> T cells secreting cytokines. The initial gate utilized was side scatter area (SSC-A) versus side scatter height (SSC-H) to exclude doublets. Next, lymphocytes were selected in the SSC-A versus forward scatter area (FSC-A), and dead cells were excluded with LIVE/DEAD staining. CD3<sup>+</sup> T cells were selected, and CD4<sup>+</sup> T cells secreting IFN- $\gamma$ , IL-17a and IL-22 were individually assessed.

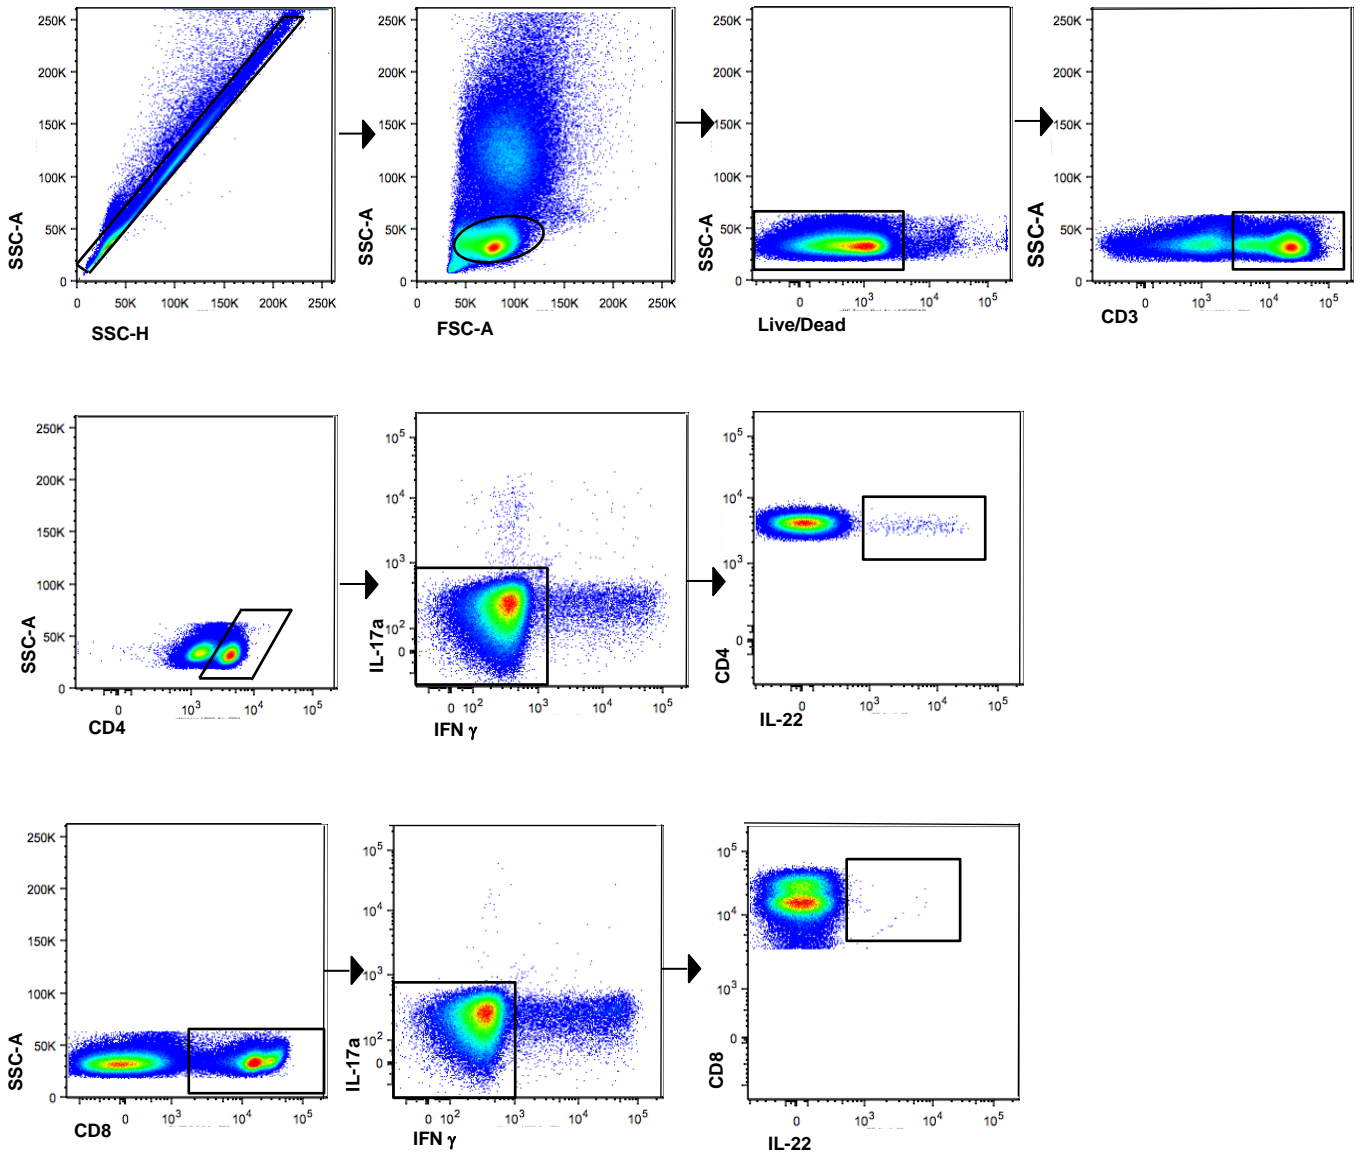

**Supplementary Figure 2.** Gating strategy to evaluate Th22 and Tc22 cells. The initial gate utilized was side scatter area (SSC-A) versus side scatter height (SSC-H) to exclude doublets. Next, lymphocytes were selected in the SSC-A versus forward scatter area (FSC-A), and dead cells were excluded with LIVE/DEAD staining. CD3+ T cells were selected, and CD4+ or CD8+ T cells were also selected, excluding IFN- $\gamma$  and IL-17a, and were evaluated for IL-22 production.

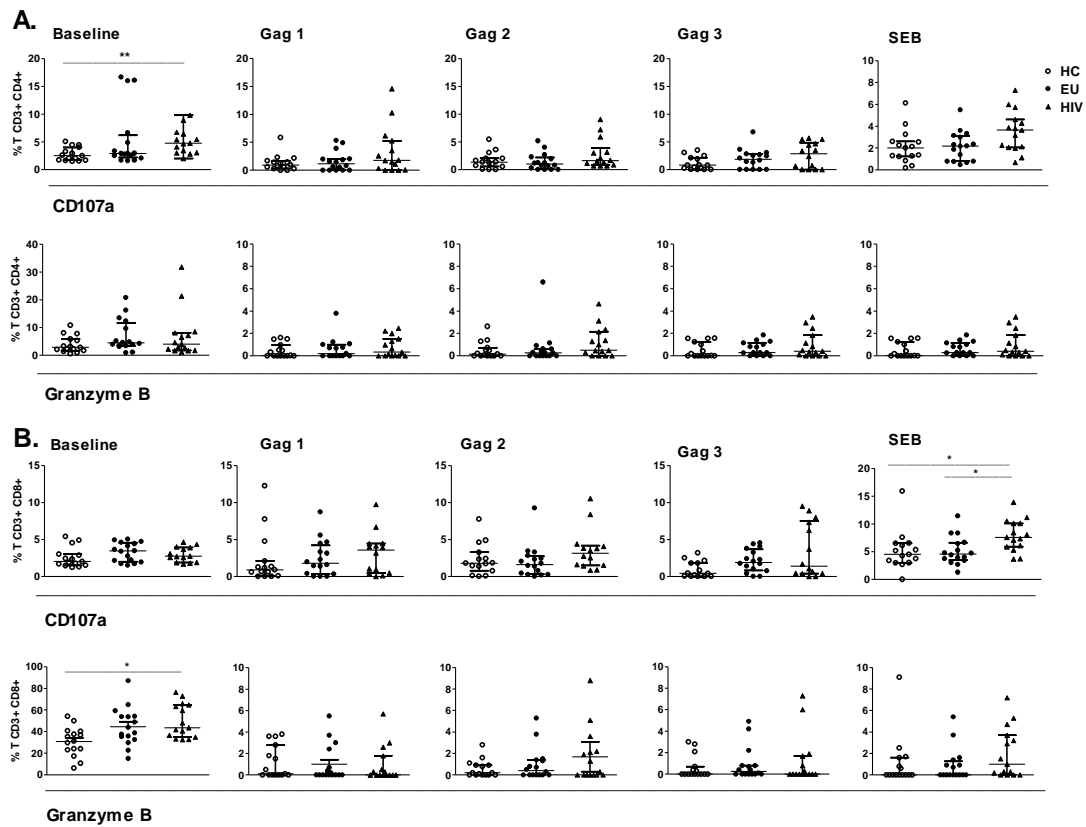

**Supplementary Figure 3.** Cytotoxic CD4+ and CD8+ T cells in EUs and HIV-infected subjects. PBMCs from HCs (n=15), EUs (n=16) and HIV-infected individuals (n=15) were cultivated with medium (baseline), HIV Gag peptide pools[Gag1 (p17), Gag2 (p24), and Gag3 (p15)], or SEB for 6 h and Brefeldin A for 4 h. TCD4+ (A) and TCD8+ (B) cells expressing CD107a and granzyme B were assessed by flow cytometry. Frequency of CD4+ or CD8+ T cells was subtracted from baseline. The results are expressed as **medians and IQRs**. \* $p \leq 0.05$  and \*\* $p \leq 0.01$ .

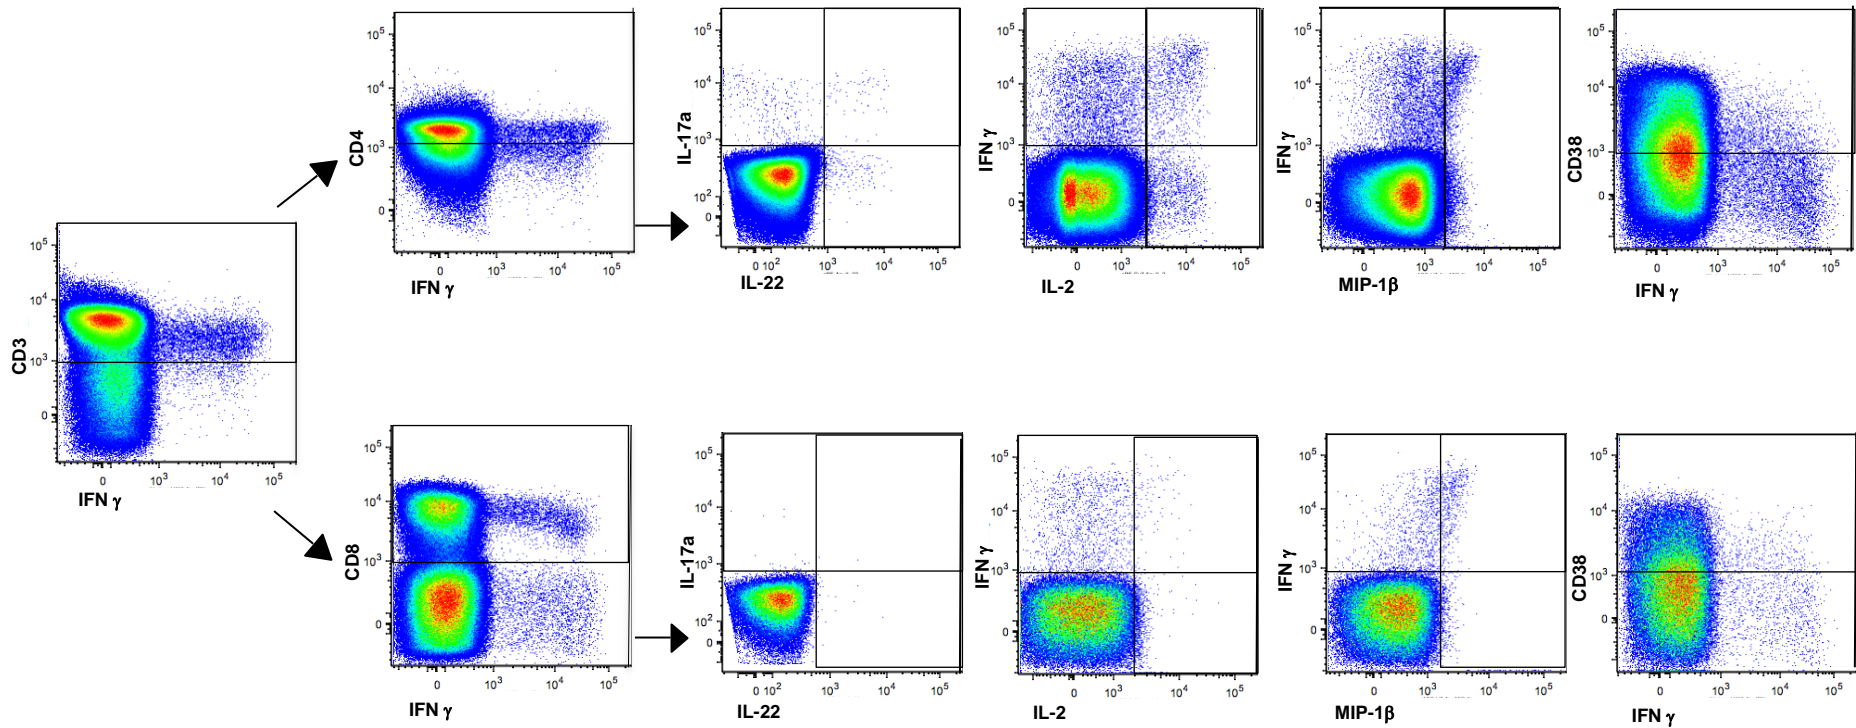

**Supplementary Figure 4.** Gate strategy for polyfunctional CD4<sup>+</sup> and CD8<sup>+</sup> T cells. The expression of each cytokine was selected for in CD3<sup>+</sup> T cells, followed by CD4<sup>+</sup> T or CD8<sup>+</sup> cells in the same combination. Next, Boolean evaluation of several combinations of secreted cytokines was performed, and CD38 expression was assessed.
